# Supplementary material for: Generation of inner ear hair cells by direct lineage conversion of primary somatic cells
Source: eLife. 2020 Jun 30;9:e55249. doi: 10.7554/eLife.55249 (PMC7326493; doi:10.7554/eLife.55249)
Supplement: Figure 2—source data 1. — These three clusters of GO terms were used to generate cluster-specific gene sets driving the GO designation. Development GO terms represented 81 genes. Stereocilia GO terms represented 165 genes. Synapse GO terms represented 149 genes. These gene lists were used to calculate the level of gene expression of each GO cluster in MEFs, P1 HCs and iHCs (violin plots, Figure 2C). [file elife-55249-fig2-data1.xlsx]

## Sheet: Sheet1
Development GO genes		Stereocilia GO genes			Synapse GO genes
(81 genes)		(165 genes)			(149 genes)
Afdn	Otof	Abcc8	Dnaic2	Myo6	Adcy1	Ephb1	Rsph4a
Aldh1a3	Pcdh15	Ablim2	Dpp10	Nedd4l	Add2	Erbb4	Sdk1
Arl6	Pjvk	Acsl6	Drc1	Neurl1a	Afdn	Erc2	Sdk2
Asic2	Pou4f3	Afdn	Dync2h1	Nme5	Amph	Fmn2	Sema4d
Asic3	Prom1	Akap6	Eno4	Nrcam	Ank3	Gabrb3	Sez6l
Atp2b2	Prox1	Akap9	Eps8l2	Odf2	Ap1ar	Grid2	Sez6l2
Bcl2	Ptprq	Aldh1a3	Espn	Onecut2	Ap3b2	Grip1	Sh3gl2
Bdnf	Ripor2	Ank3	Evl	P2rx3	Ap3m2	Grm4	Shank2
Bmp2	Rorb	Arl6	Eya1	Parvb	Apba1	Hap1	Six1
Bmp7	Rpgr	Armc9	Fam161a	Pcdh15	Asic1	Homer1	Six4
Cabp2	Sall1	Asic1	Fzd3	Pex5l	Asic2	Ica1	Slc17a8
Cacna1d	Scn8a	Asic2	Fzd6	Pou4f3	Atp2b2	Ift22	Snap25
Cacnb3	Sdk1	Asic3	Gabrb3	Prkcd	Bbs1	Igsf21	Snap91
Casz1	Sdk2	Atp1b2	Gclc	Prkcz	Bdnf	Igsf9	Sorbs1
Cdc14a	Six1	Atp2b2	Grid2	Ptpn3	Bicd1	Kif19a	Sorbs2
Cdh23	Six4	Bbs1	Grik3	Ptprq	Brsk1	Kif1a	Spef2
Cdkn2d	Slc17a8	Bcl2	Grxcr1	Rab3ip	Bsn	Kif21a	Sptbn2
Cecr2	Sptbn4	Bdnf	Gstm7	Rap1gap	Btbd9	Kif24	Srcin1
Chd7	Stox1	Cacna1b	Hap1	Reln	Cacna1b	Kif28	Ssx2ip
Chrna10	Stra6	Cacna1d	Hecw1	Rem2	Cacna2d2	Kif3c	Stx1a
Chrna9	Strc	Cacna2d2	Homer1	Rfx3	Cacnb3	Kif5a	Stxbp5l
Chrnb2	Tmc1	Cacna2d4	Hspa2	Rims3	Cacng2	Kif5c	Sv2a
Clic5	Tmc2	Cacnb3	Htr3a	Ripor2	Cadm1	Kif6	Syn1
Cux1	Tmie	Cacng2	Ift22	Rpgr	Cadps	Kif9	Syn2
Dscam	Tomt	Cacng4	Insyn1	Rsph4a	Camk2b	Kifc2	Syt1
Ephb1	Tprn	Cacng5	Intu	Ryr2	Cbln1	Klc3	Syt2
Eps8l2	Tspan12	Cbln1	Iqcg	S100a1	Ccdc151	L1cam	Syt4
Espn	Ush1g	Ccdc151	Iqub	Scn3a	Ccdc40	Lrp8	Syt7
Espnl	Vangl2	Ccdc40	Jup	Scn5a	Ccdc65	Lrtm2	Tanc1
Eya1	Whrn	Ccdc65	Kcna10	Scn8a	Cd24a	Madd	Tnc
Eya4		Ccp110	Kcnab2	Shank2	Cdk5r1	Mak	Trim9
Fzd3		Cdc14a	Kcnh2	Shtn1	Cfap54	Mapt	Ttc21a
Fzd6		Cdh23	Kcnh6	Six1	Chrnb1	Mdga1	Unc13b
Gabrb3		Cecr2	Kcnh7	Six4	Chrnb2	Mreg	Usp46
Gdf11		Celf4	Kcnj11	Spag6l	Chrnb3	Myo6	Vamp1
Grxcr1		Celsr3	Kcnk1	Spef2	Clcn3	Napb	Wasf1
Grxcr2		Cep126	Kcnmb2	Ssx2ip	Cnih2	Ncan	Wdr63
Hipk2		Cep250	Kcnn2	Stox1	Cnksr2	Nectin1	Wdr66
Insm1		Cfap54	Kcnq2	Strc	Cntn2	Neurl1a	Wnt7b
Jag2		Chd7	Kcns3	Stx1a	Cplx1	Nfasc
Kit		Chrna10	Kif19a	Tesc	Cplx2	Nme5
Lhfpl5		Chrna9	Kif24	Tmc1	Ctnna2	Nrcam
Mcoln3		Chrnb1	Kit	Tmc2	Ctnnd2	Nrxn3
Megf11		Chrnb2	Klc3	Tmie	Dctn1	Otof
Mycl		Chrnb3	Klf5	Tprn	Dgkz	Pacsin1
Mycn		Chrnb4	Lhfpl5	Trpm4	Dlg2	Pclo
Myo15		Chrng	Lime1	Tspan13	Dlgap3	Plxnb1
Myo3b		Clic5	Lrguk	Ttc21a	Dnah6	Ppfia3
Myo6		Clic6	Lrrc46	Twf2	Dnah9	Prepl
Nav2		Cnih2	Mak	Unc13b	Dnaic2	Prkcz
Nectin1		Cnih3	Mapk8ip2	Ush1g	Dnajc6	Rab3b
		Crhbp	Mapt	Vangl2	Dok7	Reln
		Cyfip2	Mpp2	Wdr63	Drc1	Rfx3
		Cyld	Myo15	Whrn	Dync2h1	Rims3
		Dctn1	Myo3b	Wnk2	Elfn1	Rpgr
