# Supplementary material for: Generation of inner ear hair cells by direct lineage conversion of primary somatic cells
Source: eLife. 2020 Jun 30;9:e55249. doi: 10.7554/eLife.55249 (PMC7326493; doi:10.7554/eLife.55249)
Supplement: Figure 3—source data 1. — We defined groups of genes as part of a specific signature for each cell type. MEF signature represents 188 genes. HC signature represents 109 genes. MC signature represents 43 genes. CGP signature represents 69 genes. GUT signature represents 113 genes. These gene signatures were used to calculate Normalized Enrichment Scores (NES) (Subramanian et al., 2005) and p-values for each cell type in comparison to iHCs (table, Figure 3D). [file elife-55249-fig3-data1.xlsx]

## Sheet: Sheet1
HC Signature		MC Signature		CGP Signature		GUT Signature		MEF Signature
Symbol	EnsemblID	Symbol	EnsemblID	Symbol	EnsemblID	Symbol	EnsemblID	Symbol	EnsemblID
Adgrv1	ENSMUSG00000069170	Ahnak	ENSMUSG00000069833	Adcyap1r1	ENSMUSG00000029778	5330417C22Rik	ENSMUSG00000040412	Adamts15	ENSMUSG00000033453
Ankfn1	ENSMUSG00000047773	Apoe	ENSMUSG00000002985	Adgrb3	ENSMUSG00000033569	A4gnt	ENSMUSG00000037953	Adamts5	ENSMUSG00000022894
Ankrd24	ENSMUSG00000054708	Avil	ENSMUSG00000025432	Akap6	ENSMUSG00000061603	Adgre5	ENSMUSG00000002885	Aebp1	ENSMUSG00000020473
Cd164l2	ENSMUSG00000028865	Cav2	ENSMUSG00000000058	Atp1a3	ENSMUSG00000040907	Agr2	ENSMUSG00000020581	Agtr1a	ENSMUSG00000049115
Cdh23	ENSMUSG00000012819	Ccer2	ENSMUSG00000096257	Barhl2	ENSMUSG00000034384	Ang4	ENSMUSG00000060615	Agtr2	ENSMUSG00000068122
Cdkl4	ENSMUSG00000033966	Cd44	ENSMUSG00000005087	Basp1	ENSMUSG00000045763	Ano7	ENSMUSG00000034107	Aldh1l2	ENSMUSG00000020256
Cfap206	ENSMUSG00000028294	Cdh3	ENSMUSG00000061048	Cadm2	ENSMUSG00000064115	Aoc1	ENSMUSG00000029811	Ar	ENSMUSG00000046532
Cfap52	ENSMUSG00000020904	Col17a1	ENSMUSG00000025064	Camk4	ENSMUSG00000038128	Atp10b	ENSMUSG00000055415	Aspn	ENSMUSG00000021388
Cfap54	ENSMUSG00000020014	Dsg1a	ENSMUSG00000069441	Cdh20	ENSMUSG00000050840	AY761184	ENSMUSG00000058618	AW551984	ENSMUSG00000038112
Cfap69	ENSMUSG00000040473	Fam83c	ENSMUSG00000074647	Chrna3	ENSMUSG00000032303	B3gnt3	ENSMUSG00000031803	Axl	ENSMUSG00000002602
Chrna10	ENSMUSG00000066279	Gc	ENSMUSG00000035540	Cnpy1	ENSMUSG00000044681	Bace2	ENSMUSG00000040605	Bgn	ENSMUSG00000031375
Chrng	ENSMUSG00000026253	Gng4	ENSMUSG00000021303	Cnr1	ENSMUSG00000044288	C1galt1c1	ENSMUSG00000048970	Bicc1	ENSMUSG00000014329
Cib2	ENSMUSG00000037493	Gsdma	ENSMUSG00000017204	Dcc	ENSMUSG00000060534	Capn9	ENSMUSG00000031981	C1ra	ENSMUSG00000055172
Cldn9	ENSMUSG00000066720	Hspb1	ENSMUSG00000004951	Dcx	ENSMUSG00000031285	Casp1	ENSMUSG00000025888	C1s1	ENSMUSG00000038521
Col11a2	ENSMUSG00000024330	Kcnv1	ENSMUSG00000022342	Diras2	ENSMUSG00000047842	Ccl9	ENSMUSG00000019122	C2	ENSMUSG00000024371
Col2a1	ENSMUSG00000022483	Krt10	ENSMUSG00000019761	Elavl2	ENSMUSG00000008489	Cdh17	ENSMUSG00000028217	C3	ENSMUSG00000024164
Col9a1	ENSMUSG00000026147	Krt17	ENSMUSG00000035557	Elavl3	ENSMUSG00000003410	Cdhr2	ENSMUSG00000034918	Calu	ENSMUSG00000029767
Col9a2	ENSMUSG00000028626	Krt27	ENSMUSG00000017588	Fgf5	ENSMUSG00000029337	Ceacam1	ENSMUSG00000074272	Capn6	ENSMUSG00000067276
Coro2a	ENSMUSG00000028337	Krt33a	ENSMUSG00000035592	Gap43	ENSMUSG00000047261	Cgref1	ENSMUSG00000029161	Casp12	ENSMUSG00000025887
Dlec1	ENSMUSG00000038060	Krt5	ENSMUSG00000061527	Gng3	ENSMUSG00000071658	Clca1	ENSMUSG00000028255	Cavin2	ENSMUSG00000045954
Dlk2	ENSMUSG00000047428	Krt79	ENSMUSG00000061397	Gpm6a	ENSMUSG00000031517	Cldn15	ENSMUSG00000001739	Ccl2	ENSMUSG00000035385
Dytn	ENSMUSG00000069085	Lamb3	ENSMUSG00000026639	Gria2	ENSMUSG00000033981	Clec2h	ENSMUSG00000030364	Ccn3	ENSMUSG00000037362
Ecel1	ENSMUSG00000026247	Lgals7	ENSMUSG00000053522	Hpca	ENSMUSG00000028785	Clps	ENSMUSG00000024225	Ccn4	ENSMUSG00000005124
Elfn1	ENSMUSG00000048988	Lhx2	ENSMUSG00000000247	Iglon5	ENSMUSG00000013367	Clrn3	ENSMUSG00000050866	Cd302	ENSMUSG00000060703
Elfn2	ENSMUSG00000043460	Lmx1b	ENSMUSG00000038765	Islr2	ENSMUSG00000051243	Cracr2b	ENSMUSG00000048200	Cd34	ENSMUSG00000016494
Enkur	ENSMUSG00000026679	Muc1	ENSMUSG00000042784	Jakmip2	ENSMUSG00000024502	Crip1	ENSMUSG00000006360	Cdh11	ENSMUSG00000031673
Epn3	ENSMUSG00000010080	Penk	ENSMUSG00000045573	Kcnc1	ENSMUSG00000058975	D630039A03Rik	ENSMUSG00000052117	Cdon	ENSMUSG00000038119
Espnl	ENSMUSG00000049515	Phldb3	ENSMUSG00000074277	Kcnq2	ENSMUSG00000016346	Dact2	ENSMUSG00000048826	Cfh	ENSMUSG00000026365
Eya1	ENSMUSG00000025932	Pkp1	ENSMUSG00000026413	Lhx1	ENSMUSG00000018698	Defa21	ENSMUSG00000074447	Cmtm3	ENSMUSG00000031875
Faim2	ENSMUSG00000023011	Plec	ENSMUSG00000022565	Lrrc4b	ENSMUSG00000047085	Defa22	ENSMUSG00000074443	Col1a1	ENSMUSG00000001506
Fbxo2	ENSMUSG00000041556	Ppl	ENSMUSG00000039457	Lynx1	ENSMUSG00000022594	Defa29	ENSMUSG00000074437	Col1a2	ENSMUSG00000029661
Foxj1	ENSMUSG00000034227	Ppp1r16b	ENSMUSG00000037754	Mab21l1	ENSMUSG00000056947	Defa30	ENSMUSG00000074444	Col3a1	ENSMUSG00000026043
Fscn2	ENSMUSG00000025380	Prrxl1	ENSMUSG00000041730	Man1c1	ENSMUSG00000037306	Defa32	ENSMUSG00000094818	Col5a1	ENSMUSG00000026837
Gm32742	ENSMUSG00000110266	Serpinb5	ENSMUSG00000067006	Map1b	ENSMUSG00000052727	Defa33	ENSMUSG00000094362	Col5a2	ENSMUSG00000026042
Grk1	ENSMUSG00000031450	Slc35d3	ENSMUSG00000050473	Map6	ENSMUSG00000055407	Defa34	ENSMUSG00000063206	Col6a1	ENSMUSG00000001119
Grxcr1	ENSMUSG00000068082	Sv2c	ENSMUSG00000051111	Myt1l	ENSMUSG00000061911	Defa37	ENSMUSG00000065956	Col6a2	ENSMUSG00000020241
Grxcr2	ENSMUSG00000073574	Syn2	ENSMUSG00000009394	Ndst3	ENSMUSG00000027977	Defa5	ENSMUSG00000074439	Col6a3	ENSMUSG00000048126
Kif27	ENSMUSG00000060176	Tchh	ENSMUSG00000052415	Nell2	ENSMUSG00000022454	Dennd2d	ENSMUSG00000027901	Col8a2	ENSMUSG00000056174
Lmod1	ENSMUSG00000048096	Thsd4	ENSMUSG00000032289	Neurod1	ENSMUSG00000034701	Edem1	ENSMUSG00000030104	Cped1	ENSMUSG00000062980
Loxhd1	ENSMUSG00000032818	Tmem158	ENSMUSG00000054871	Nlgn3	ENSMUSG00000031302	Enpp3	ENSMUSG00000019989	Cpxm1	ENSMUSG00000027408
Lrrc10b	ENSMUSG00000090291	Trim29	ENSMUSG00000032013	Nova1	ENSMUSG00000021047	Fcgbp	ENSMUSG00000047730	Crtap	ENSMUSG00000032431
Mindy4b-ps	ENSMUSG00000101860	Trp63	ENSMUSG00000022510	Nova2	ENSMUSG00000030411	Fhod1	ENSMUSG00000014778	Ctsk	ENSMUSG00000028111
Mogat1	ENSMUSG00000012187	Wnt10b	ENSMUSG00000022996	Otx2	ENSMUSG00000021848	Foxa3	ENSMUSG00000040891	Ctsl	ENSMUSG00000021477
Mreg	ENSMUSG00000039395			Pag1	ENSMUSG00000027508	Gal3st2b	ENSMUSG00000093805	Cxcl5	ENSMUSG00000029371
Myo3a	ENSMUSG00000025716			Pax6	ENSMUSG00000027168	Gale	ENSMUSG00000028671	Cyp1b1	ENSMUSG00000024087
Myo3b	ENSMUSG00000042064			Plxnc1	ENSMUSG00000074785	Galnt12	ENSMUSG00000039774	Dcn	ENSMUSG00000019929
Myo6	ENSMUSG00000033577			Ppfia2	ENSMUSG00000053825	Galnt4	ENSMUSG00000090035	Ddit4l	ENSMUSG00000046818
Nme5	ENSMUSG00000035984			Ppp2r2c	ENSMUSG00000029120	Gcnt3	ENSMUSG00000032226	Ddr2	ENSMUSG00000026674
Otof	ENSMUSG00000062372			Prdm8	ENSMUSG00000035456	Gm1123	ENSMUSG00000044860	Degs1	ENSMUSG00000038633
Otog	ENSMUSG00000009487			Psd2	ENSMUSG00000024347	Gm14851	ENSMUSG00000061958	Dlk1	ENSMUSG00000040856
Otogl	ENSMUSG00000091455			Rab9b	ENSMUSG00000043463	Gm7849	ENSMUSG00000079114	Dpt	ENSMUSG00000026574
P2rx3	ENSMUSG00000027071			Reln	ENSMUSG00000042453	Gm7861	ENSMUSG00000079113	Dse	ENSMUSG00000039497
Padi2	ENSMUSG00000028927			Rims1	ENSMUSG00000041670	Gmds	ENSMUSG00000038372	Edil3	ENSMUSG00000034488
Ptprq	ENSMUSG00000035916			Scrt1	ENSMUSG00000048385	Gpa33	ENSMUSG00000000544	Efemp1	ENSMUSG00000020467
Pvalb	ENSMUSG00000005716			Sema6a	ENSMUSG00000019647	Gpx1	ENSMUSG00000063856	Efemp2	ENSMUSG00000024909
Rab36	ENSMUSG00000020175			Slc30a10	ENSMUSG00000026614	Guca2a	ENSMUSG00000023247	Fam129a	ENSMUSG00000026483
Raver2	ENSMUSG00000035275			Soga3	ENSMUSG00000038916	Gucy2c	ENSMUSG00000042638	Fbln2	ENSMUSG00000064080
Rhpn1	ENSMUSG00000022580			Sox11	ENSMUSG00000063632	Herpud1	ENSMUSG00000031770	Fbln5	ENSMUSG00000021186
Sall3	ENSMUSG00000024565			Sphkap	ENSMUSG00000026163	Hgfac	ENSMUSG00000029102	Fbn1	ENSMUSG00000027204
Scn11a	ENSMUSG00000034115			St18	ENSMUSG00000033740	Hnf4a	ENSMUSG00000017950	Fgf7	ENSMUSG00000027208
Six1	ENSMUSG00000051367			Stmn2	ENSMUSG00000027500	Hpd	ENSMUSG00000029445	Fibin	ENSMUSG00000074971
Skor1	ENSMUSG00000022245			Stmn4	ENSMUSG00000022044	Igsf5	ENSMUSG00000000159	Fkbp14	ENSMUSG00000038074
Strc	ENSMUSG00000033498			Tmem178	ENSMUSG00000024245	Itln1	ENSMUSG00000038209	Fkbp7	ENSMUSG00000002732
Tafa3	ENSMUSG00000055865			Tubb4a	ENSMUSG00000062591	Krt19	ENSMUSG00000020911	Flrt2	ENSMUSG00000047414
Tbx2	ENSMUSG00000000093			Unc5c	ENSMUSG00000059921	Lgals2	ENSMUSG00000043501	Gabre	ENSMUSG00000031340
Tecta	ENSMUSG00000037705			Uncx	ENSMUSG00000029546	Lgals4	ENSMUSG00000053964	Gask1b	ENSMUSG00000027955
Tectb	ENSMUSG00000024979			Zic1	ENSMUSG00000032368	Lyz1	ENSMUSG00000069515	Gbp10	ENSMUSG00000105096
Tjap1	ENSMUSG00000012296			Zic2	ENSMUSG00000061524	Mapk13	ENSMUSG00000004864	Gbp2	ENSMUSG00000028270
Tmem173	ENSMUSG00000024349			Zic5	ENSMUSG00000041703	Mlph	ENSMUSG00000026303	Gbp7	ENSMUSG00000040253
Tmem255b	ENSMUSG00000038457					Mmp7	ENSMUSG00000018623	Gbp9	ENSMUSG00000029298
Tmie	ENSMUSG00000049555					Mon1a	ENSMUSG00000032583	Ghr	ENSMUSG00000055737
Tmod1	ENSMUSG00000028328					Mptx2	ENSMUSG00000079180	Gm4951	ENSMUSG00000073555
Tmprss3	ENSMUSG00000024034					Muc13	ENSMUSG00000022824	Grem2	ENSMUSG00000050069
Tnc	ENSMUSG00000028364					Myo1a	ENSMUSG00000025401	Gypc	ENSMUSG00000090523
Tomt	ENSMUSG00000078630					Myo5c	ENSMUSG00000033590	Hacd4	ENSMUSG00000028497
Trnp1	ENSMUSG00000056596					Naip5	ENSMUSG00000071203	Hoxd8	ENSMUSG00000027102
Ttc21a	ENSMUSG00000032514					Naip6	ENSMUSG00000078942	Ifi202b	ENSMUSG00000026535
Ttc24	ENSMUSG00000051036					Nipal1	ENSMUSG00000067219	Ifi204	ENSMUSG00000073489
Twf2	ENSMUSG00000023277					Nlrc4	ENSMUSG00000039193	Ifi44	ENSMUSG00000028037
Ubxn11	ENSMUSG00000012126					Oit1	ENSMUSG00000021749	Ifit1	ENSMUSG00000034459
Ulk4	ENSMUSG00000040936					Pdia5	ENSMUSG00000022844	Ifit2	ENSMUSG00000045932
Ush2a	ENSMUSG00000026609					Pigr	ENSMUSG00000026417	Ifit3	ENSMUSG00000074896
Veph1	ENSMUSG00000027831					Plekhb2	ENSMUSG00000026123	Ifit3b	ENSMUSG00000062488
Wdr63	ENSMUSG00000043020					Pmm2	ENSMUSG00000022711	Ifitm3	ENSMUSG00000025492
Zfp474	ENSMUSG00000046886					Pnliprp2	ENSMUSG00000025091	Igf2	ENSMUSG00000048583
						Rab3d	ENSMUSG00000019066	Igfbp4	ENSMUSG00000017493
						Rasgrf2	ENSMUSG00000021708	Igfbp6	ENSMUSG00000023046
						Rassf6	ENSMUSG00000029370	Igsf10	ENSMUSG00000036334
						Rbm47	ENSMUSG00000070780	Iigp1	ENSMUSG00000054072
						Rbp2	ENSMUSG00000032454	Il1r1	ENSMUSG00000026072
						Reg3b	ENSMUSG00000071356	Impact	ENSMUSG00000024423
						Rep15	ENSMUSG00000040121	Itga5	ENSMUSG00000000555
						Rnase1	ENSMUSG00000035896	Itm2a	ENSMUSG00000031239
						Rpl4	ENSMUSG00000032399	Jdp2	ENSMUSG00000034271
						Samhd1	ENSMUSG00000027639	Kctd12	ENSMUSG00000098557
						Serpinb1a	ENSMUSG00000044734	Lama4	ENSMUSG00000019846
						Slc12a8	ENSMUSG00000035506	Ldb2	ENSMUSG00000039706
						Slc26a2	ENSMUSG00000034320	Lipa	ENSMUSG00000024781
						Slc35c1	ENSMUSG00000049922	Lix1l	ENSMUSG00000049288
						Smim6	ENSMUSG00000075420	Lox	ENSMUSG00000024529
						Spink4	ENSMUSG00000028415	Loxl2	ENSMUSG00000034205
						Tcf19	ENSMUSG00000050410	Lpar4	ENSMUSG00000049929
						Tff3	ENSMUSG00000024029	Lpl	ENSMUSG00000015568
						Tifa	ENSMUSG00000046688	Lrrc17	ENSMUSG00000039883
						Tmed6	ENSMUSG00000031919	Ly6a	ENSMUSG00000075602
						Tmem45b	ENSMUSG00000041737	Matn2	ENSMUSG00000022324
						Tmprss2	ENSMUSG00000000385	Meox2	ENSMUSG00000036144
						Trim31	ENSMUSG00000058063	Mmp19	ENSMUSG00000025355
						Tspan1	ENSMUSG00000028699	Mmp2	ENSMUSG00000031740
						Tspan8	ENSMUSG00000034127	Mmp3	ENSMUSG00000043613
						Ugt2b34	ENSMUSG00000029260	Mrc2	ENSMUSG00000020695
						Vil1	ENSMUSG00000026175	Mxra8	ENSMUSG00000029070
						Xbp1	ENSMUSG00000020484	Ndn	ENSMUSG00000033585
								Nid1	ENSMUSG00000005397
								Nid2	ENSMUSG00000021806
								Npy2r	ENSMUSG00000028004
								Nrk	ENSMUSG00000052854
								Osmr	ENSMUSG00000022146
								P3h3	ENSMUSG00000023191
								P4ha1	ENSMUSG00000019916
								P4ha2	ENSMUSG00000018906
								Pamr1	ENSMUSG00000027188
								Parp3	ENSMUSG00000023249
								Pcdh19	ENSMUSG00000051323
								Pcolce	ENSMUSG00000029718
								Pde1a	ENSMUSG00000059173
								Pdgfra	ENSMUSG00000029231
								Pdgfrb	ENSMUSG00000024620
								Pdpn	ENSMUSG00000028583
								Phf11d	ENSMUSG00000068245
								Phlda3	ENSMUSG00000041801
								Phldb2	ENSMUSG00000033149
								Pi15	ENSMUSG00000067780
								Pkd2	ENSMUSG00000034462
								Plpp3	ENSMUSG00000028517
								Plxdc2	ENSMUSG00000026748
								Pmp22	ENSMUSG00000018217
								Postn	ENSMUSG00000027750
								Ppic	ENSMUSG00000024538
								Ppm1f	ENSMUSG00000026181
								Pros1	ENSMUSG00000022912
								Prrx1	ENSMUSG00000026586
								Ptgfr	ENSMUSG00000028036
								Pwwp3b	ENSMUSG00000042515
								Rnf213	ENSMUSG00000070327
								Rspo3	ENSMUSG00000019880
								Rtl3	ENSMUSG00000047686
								S1pr3	ENSMUSG00000067586
								Scara3	ENSMUSG00000034463
								Scara5	ENSMUSG00000022032
								Sdc2	ENSMUSG00000022261
								Serpina3g	ENSMUSG00000041481
								Serpinb9	ENSMUSG00000045827
								Serpine2	ENSMUSG00000026249
								Serpinf1	ENSMUSG00000000753
								Serping1	ENSMUSG00000023224
								Serpinh1	ENSMUSG00000070436
								Sfrp2	ENSMUSG00000027996
								Slfn8	ENSMUSG00000035208
								Slit2	ENSMUSG00000031558
								Sorbs3	ENSMUSG00000022091
								Srpx	ENSMUSG00000090084
								Steap4	ENSMUSG00000012428
								Sulf1	ENSMUSG00000016918
								Sulf2	ENSMUSG00000006800
								Svep1	ENSMUSG00000028369
								Syde1	ENSMUSG00000032714
								Tbx15	ENSMUSG00000027868
								Tbx18	ENSMUSG00000032419
								Tgfbr2	ENSMUSG00000032440
								Tgfbr3	ENSMUSG00000029287
								Thbd	ENSMUSG00000074743
								Thbs2	ENSMUSG00000023885
								Timp2	ENSMUSG00000017466
								Tm4sf1	ENSMUSG00000027800
								Tmem43	ENSMUSG00000030095
								Tmem45a	ENSMUSG00000022754
								Tnxb	ENSMUSG00000033327
								Trib3	ENSMUSG00000032715
								Trim30a	ENSMUSG00000030921
								Twist1	ENSMUSG00000035799
								Usp18	ENSMUSG00000030107
								Vcam1	ENSMUSG00000027962
								Vim	ENSMUSG00000026728
								Vnn1	ENSMUSG00000037440
								Zfhx4	ENSMUSG00000025255
								Zfp260	ENSMUSG00000049421
								Zim1	ENSMUSG00000002266
